# Supplementary material for: Testosterone activates sexual dimorphism including male-typical carotenoid but not melanin plumage pigmentation in a female bird
Source: Oxford University Press journal article supplement (doi:10.1242/jeb.135384), 2016-10-01
Supplement: jeb135384supp.pdf [file jeb135384supp.pdf]

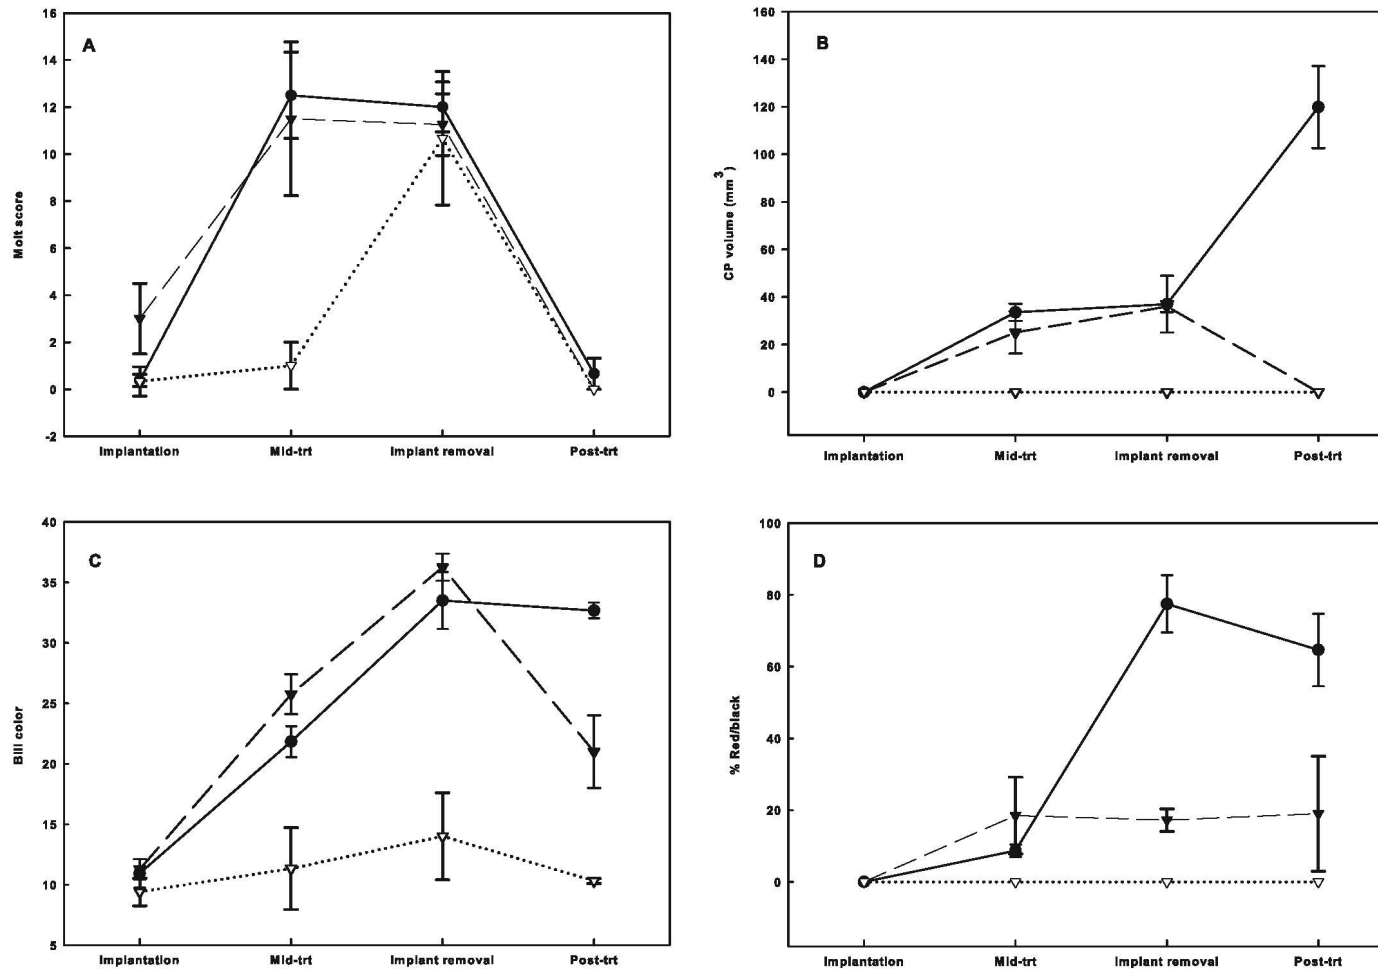

**Fig. S1:** Sex and treatment effects on dimorphic character production across the treatment period. Mean  $\pm$  s.e. of T male (black lines with solid circles), T female (dashed lines with solid triangles) and C female (dotted lines with open triangles) molt score (A), CP volume (B), bill color (C), and percent of the body in nuptial color (% red/black: D). All traits were measured four times: at the time of implantation, approximately two weeks later at a mid-treatment recapture, approximately one month following implantation at the time of implant removal, and approximately four months after implantation at a post-treatment recapture.
